# Supplementary material for: Towards the elimination of dog-mediated rabies: development and application of an evidence-based management tool
Source: PubMed Central journal article supplement (PMC7574347; doi:10.1186/s12879-020-05457-x), 2020-10-20

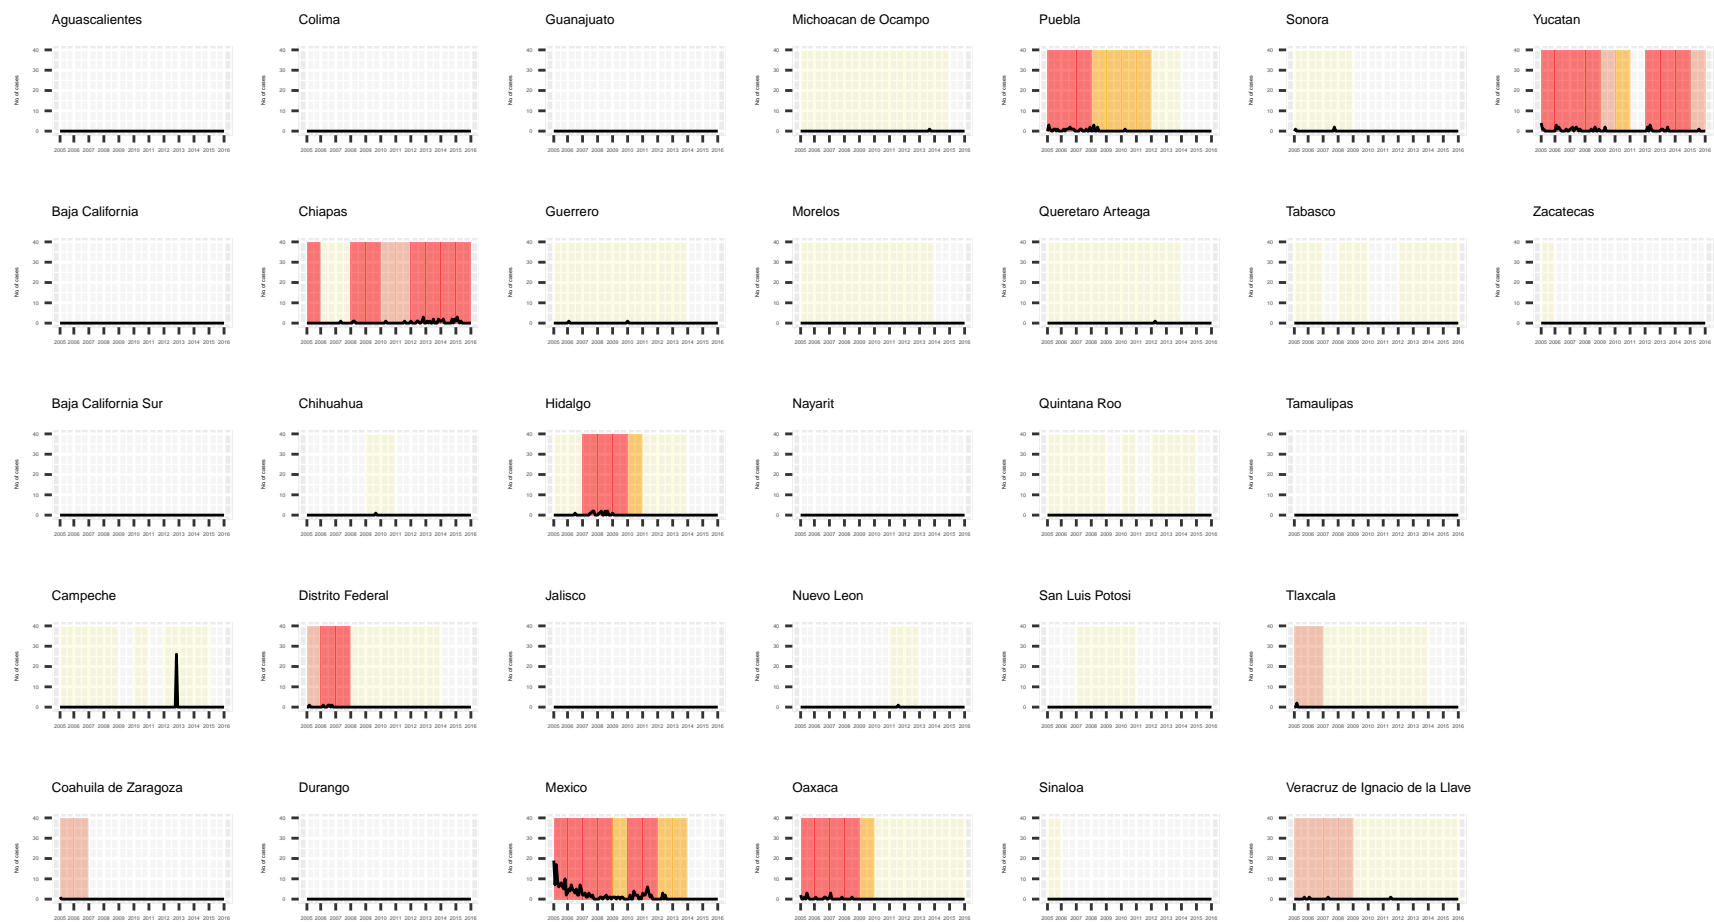

Supplement: 12879_2020_5457_MOESM3_ESM.pdf [file 12879_2020_5457_MOESM3_ESM.pdf]
