# Supplementary material for: Towards the elimination of dog-mediated rabies: development and application of an evidence-based management tool
Source: Springer Nature journal article supplement (doi:10.1186/s12879-020-05457-x), 2020-10-20

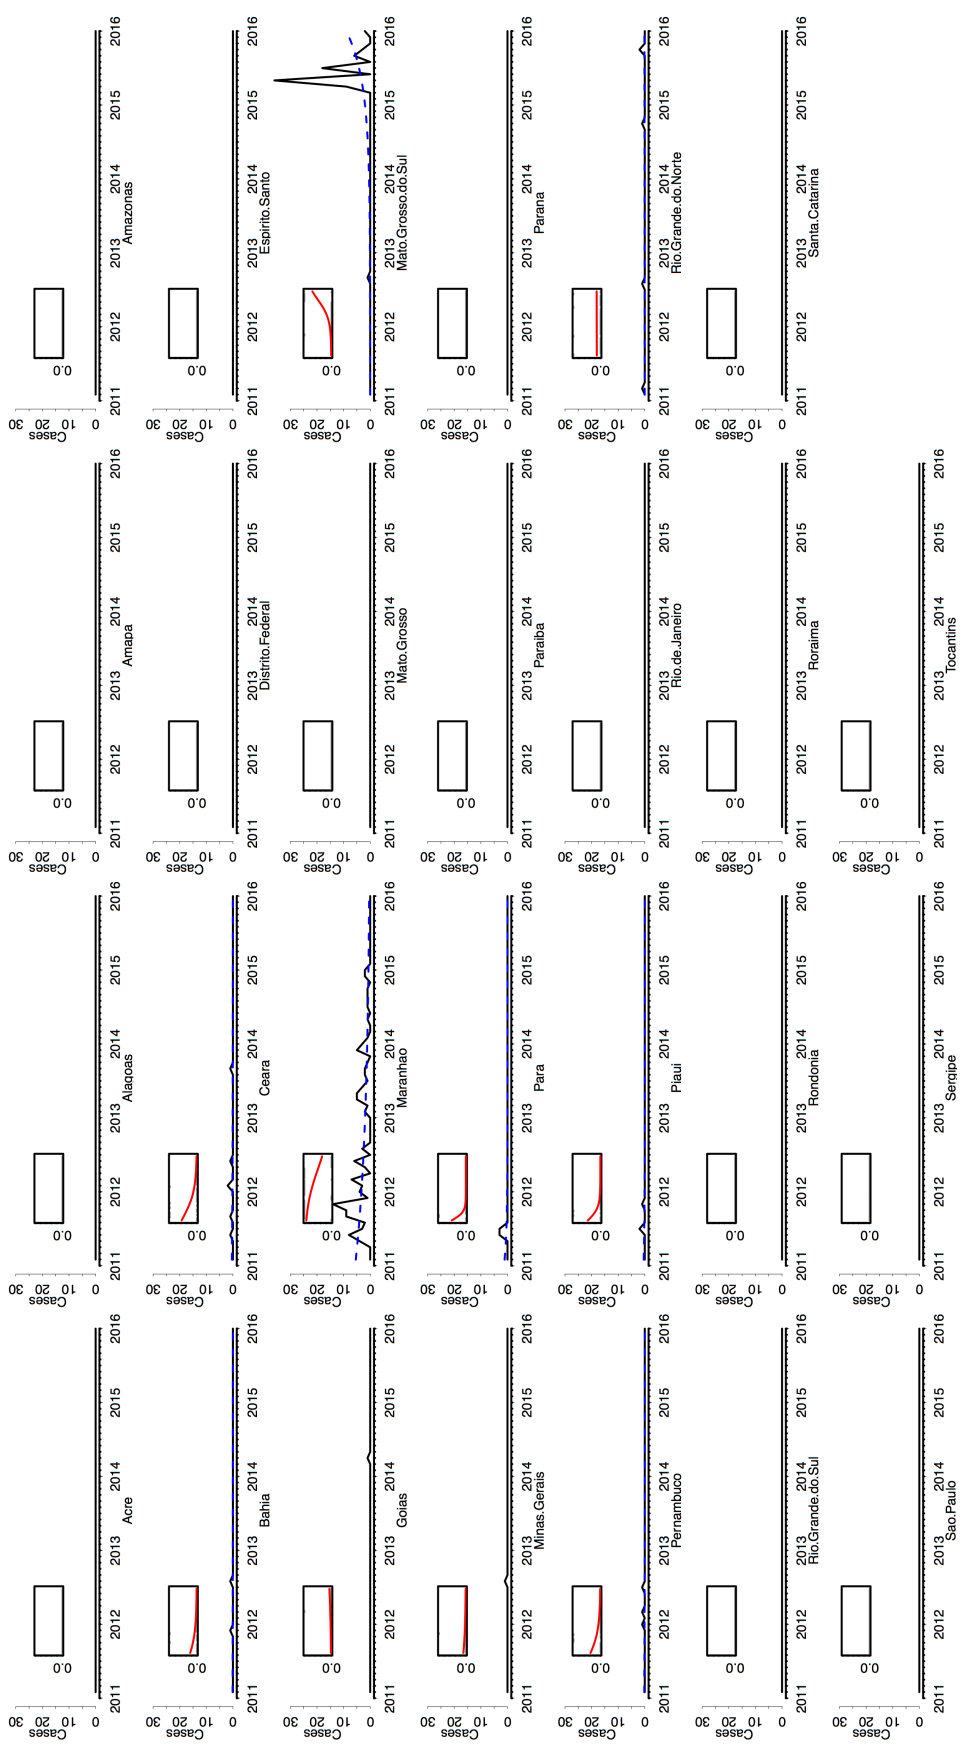

Supplement: MOESM2 [file 18504078]
